# Supplementary material for: Comprehensive vaccine design for commensal disease progression
Source: PubMed Central journal article supplement — Sci Adv. 2017 Oct 18;3(10):e1701797. doi: 10.1126/sciadv.1701797 (PMC5647123; doi:10.1126/sciadv.1701797), 2017-10-18
Supplement: 1701797_SM.pdf [file 1701797_SM.pdf]

## Supplementary Materials for **Comprehensive vaccine design for commensal disease progression**

Charles H. Jones, Guojian Zhang, Roozbeh Nayerhoda, Marie Beitelshoes, Andrew Hill, Pooya Rostami, Yi Li, Bruce A. Davidson, Paul Knight III, Blaine A. Pfeifer

Published 18 October 2017, *Sci. Adv.* **3**, e1701797 (2017)  
DOI: 10.1126/sciadv.1701797

### **This PDF file includes:**

- fig. S1. Commensal disease progression model featuring pneumococcal disease.
- fig. S2. The LEPS platform.
- fig. S3. LEPS characterization.
- fig. S4. Protective capabilities of LEPS immunizations when challenged with serotypes that span the current Prevnar 7 and Prevnar 13 treatment options.
- fig. S5. LEPS vaccine strategy in rabbits.
- fig. S6. OPA assay for GlpO and PncO directed against specific *S. pneumoniae* cell types.
- fig. S7. Evaluation of immunogenicity of GlpO and PncO administered either jointly (coadministration) or as a booster (add-on) with Prevnar 7.
- fig. S8. Additional assessment of LEPS20/PncO and GlpO when using a murine IAV-induced pneumonia model with serotype 19F.
- fig. S9. Additional murine disease model assessment of LEPS20/PncO and GlpO.
- fig. S10. Alternative LEPS formulation procedures and comparison in murine challenge protection assays.
- table S1. OPA comparison between Prevnar 13, Pneumovax 23, and a LEPS formulation containing 20 polysaccharides (that is, 20 valent).
- table S2. OPA comparison between Prevnar 13, Pneumovax 23, and the PncO + GlpO protein antigens (administered with alum adjuvant).
- table S3. GlpO and PncO summary.

## Supplementary Materials

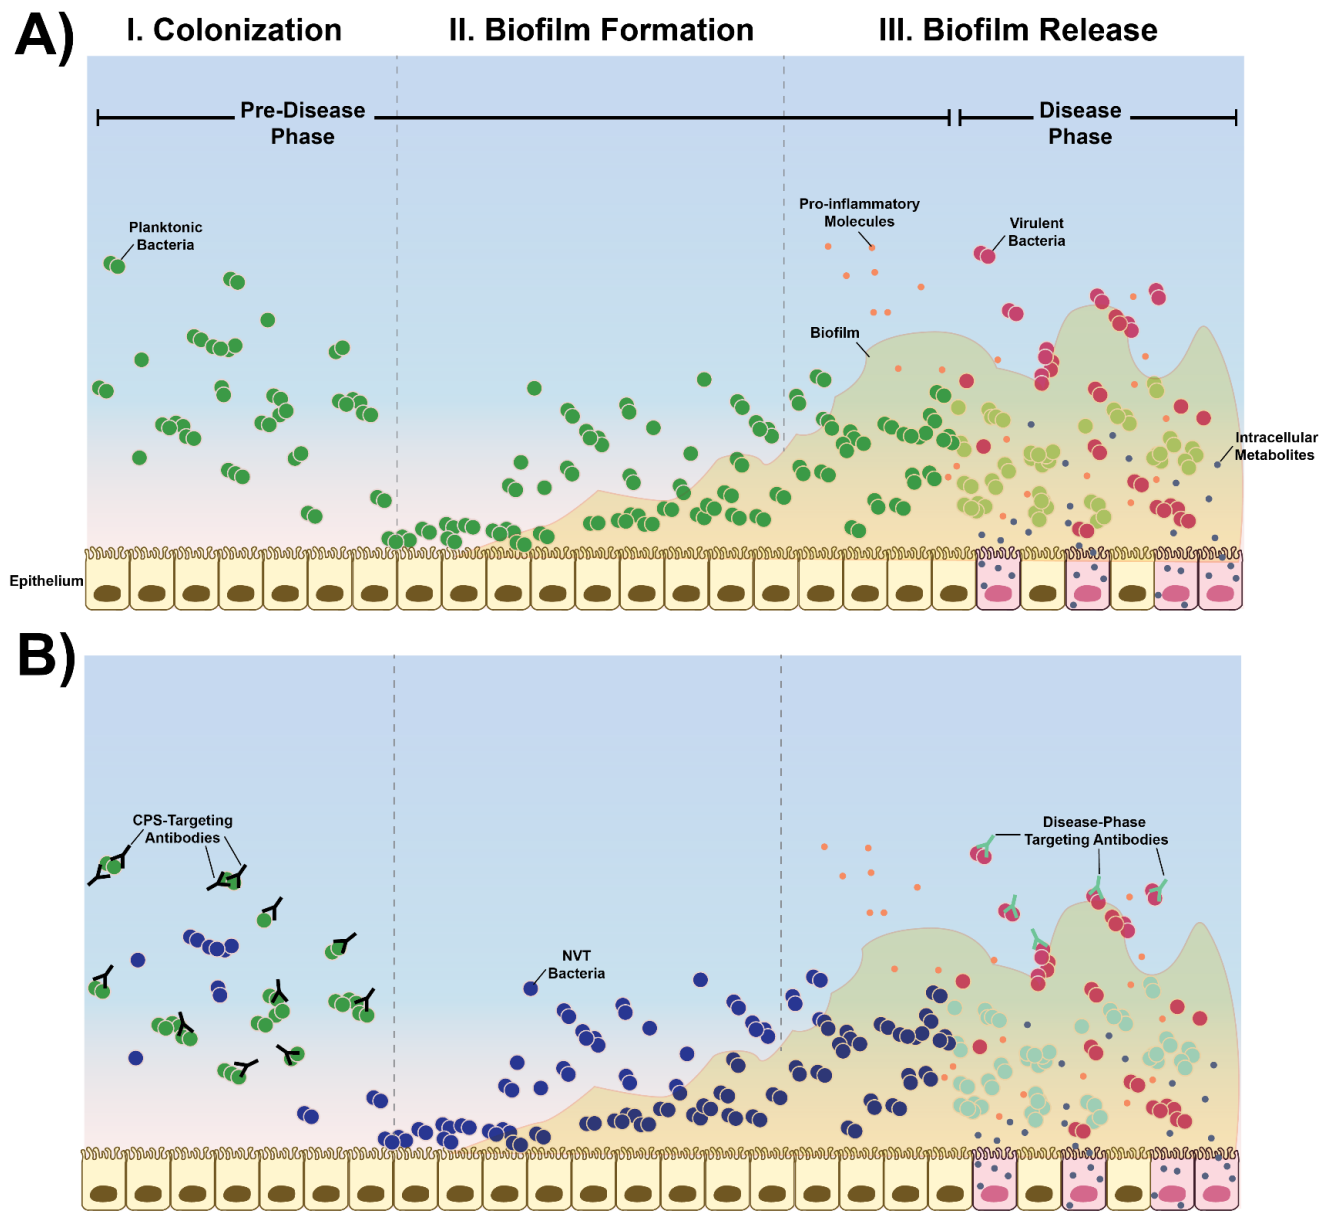

**fig. S1. Commensal disease progression model featuring pneumococcal disease.** (A) *S. pneumoniae* colonization, biofilm establishment, environmental stimulation to virulence, and biofilm release and disease symptoms. (B) Immune targets that span current vaccine options (Prevnar and Pneumovax; capsular polysaccharide [CPS] targeting of specific serotypes) and the LEPS platform (addressing both colonization of currently-covered vaccine serotypes and biofilm release of nonvaccine-type [NVT] serotypes).

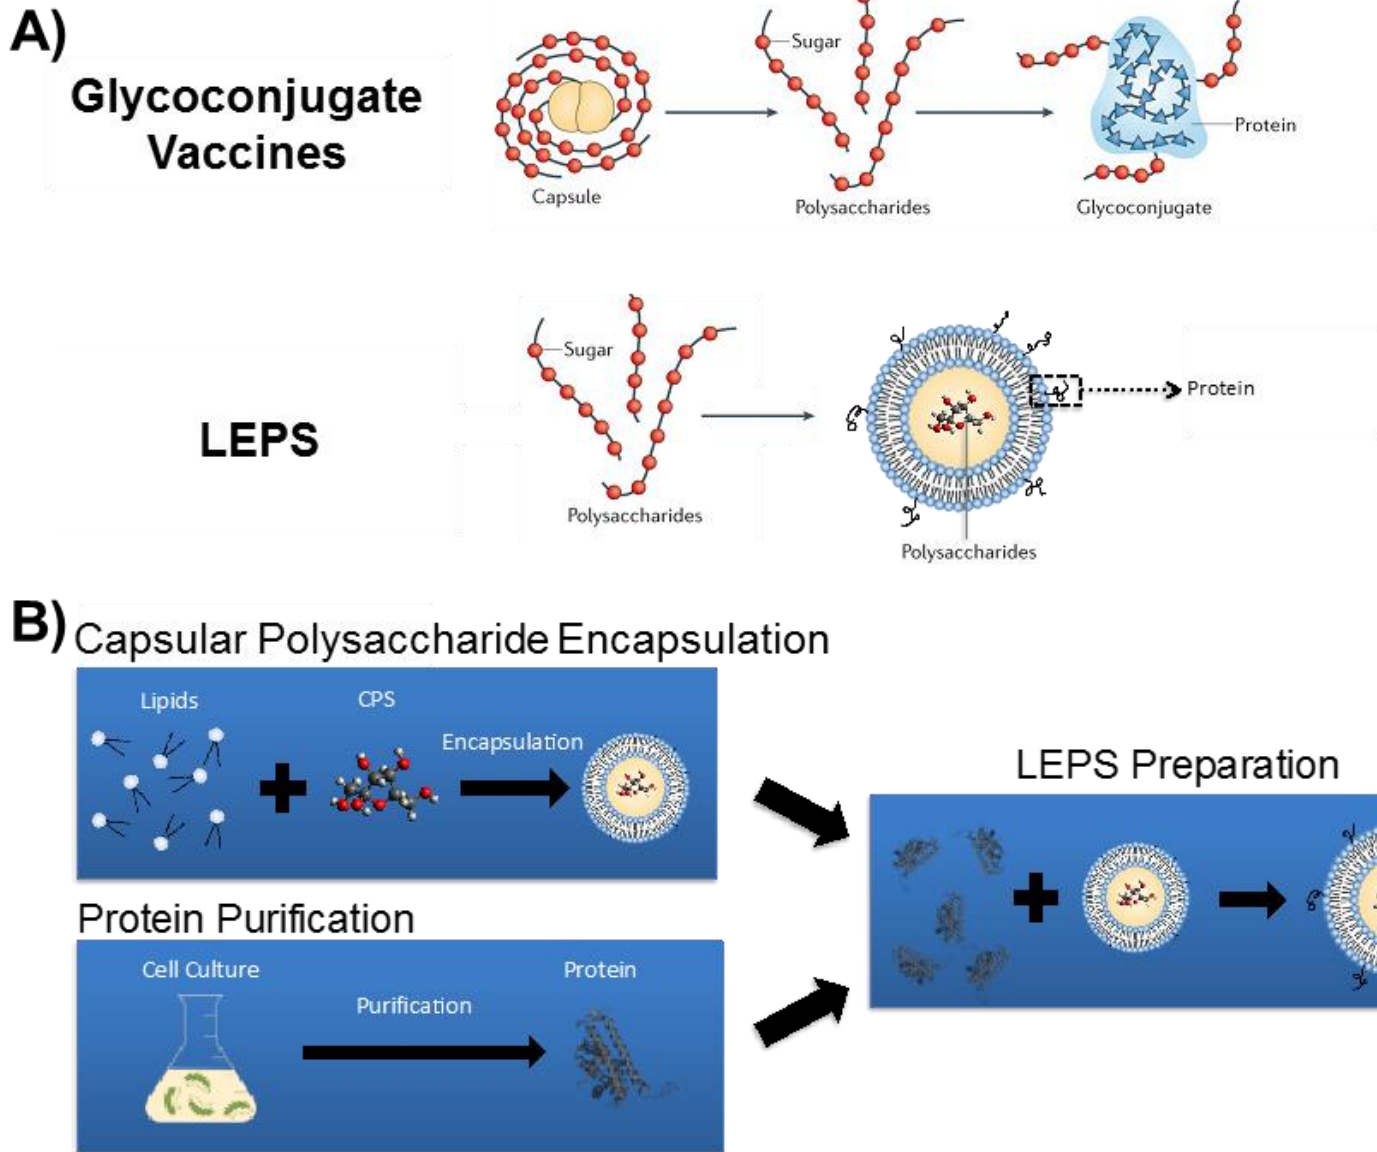

**fig. S2. The LEPS platform.** (A) Schematic comparison of a glycoconjugate vaccine (e.g., the Prevnar family) and LEPS. (B) Schematic representation of the formulation procedure to generate the LEPS particle.

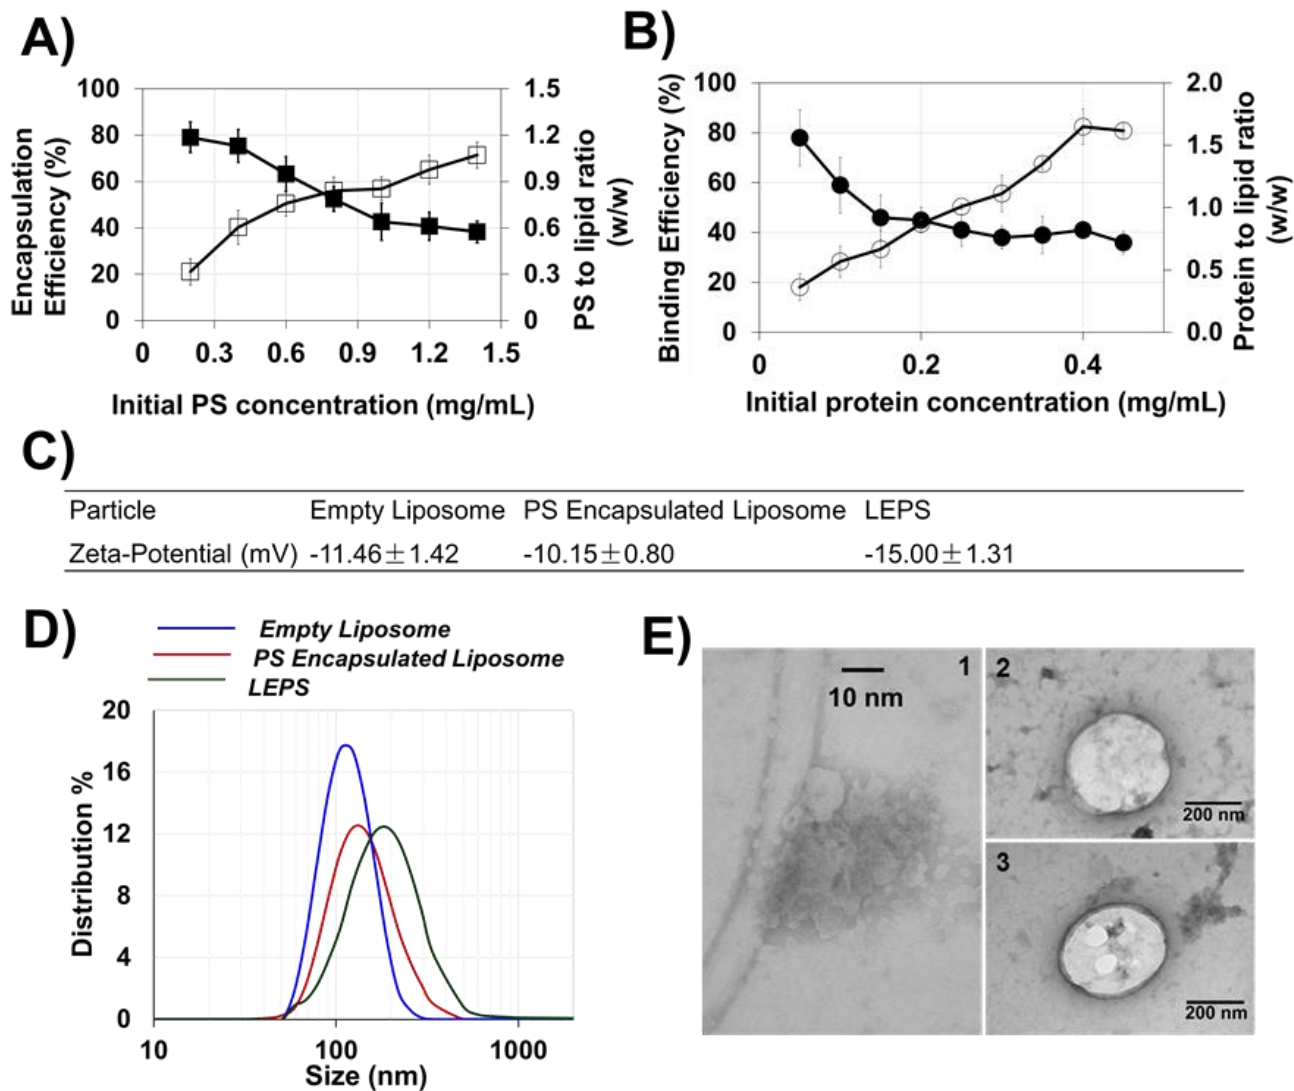

**fig. S3. LEPS characterization.** Polysaccharide (PS) encapsulation efficiency (**A**; solid squares) or protein surface binding efficiency (**B**; solid circles) vs. initial concentration. Particle surface charge evaluation (**C**) and size distribution (**D**). (**E**) LEPS particle image by transmission electron microscopy; 1: LEPS surface; 2: PS Encapsulated Liposome; 3: LEPS.

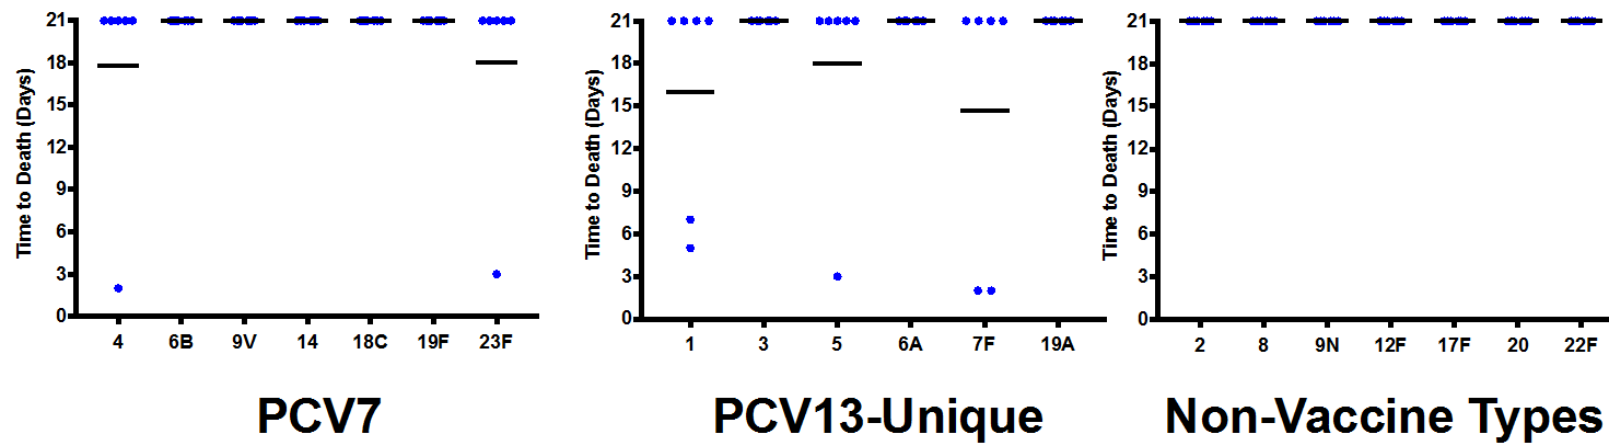

**fig. S4. Protective capabilities of LEPS immunizations when challenged with serotypes that span the current Prevnar 7 and Prevnar 13 treatment options.** Mice immunized with a LEPS formulation containing 20 polysaccharides (i.e., LEPS20) were evaluated in sepsis models and challenge strains (x-axis) are grouped into categories based upon inclusion in respective glycoconjugate vaccines. Specifically, the “PCV7” label includes bacterial serotypes covered by both Prevnar 7 and Prevnar 13; whereas, the “PCV13-Unique” grouping presents six additional serotypes covered by Prevnar 13. The “Non-Vaccine Types” label corresponds to serotypes not included in commercial glycoconjugate vaccines.

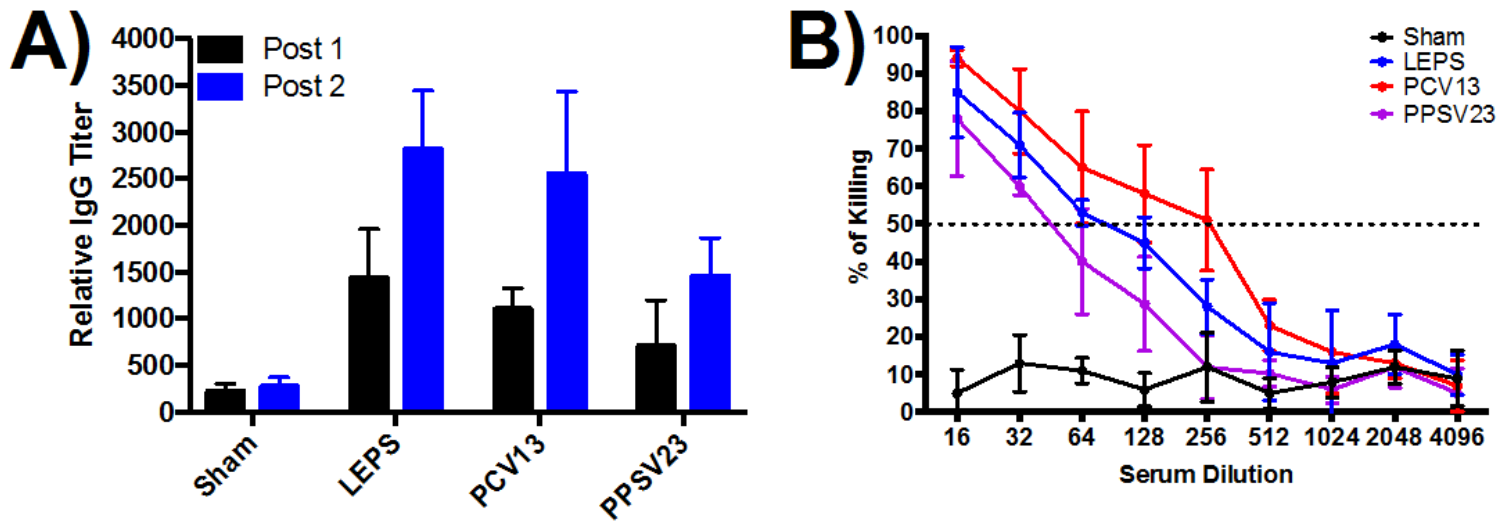

**fig. S5. LEPS vaccine strategy in rabbits.** New Zealand White rabbits were immunized with LEPS particles containing *S. pneumoniae* serotype 19F CPS (day 0) and boosted (day 14) and peripheral blood samples analyzed for (A) total IgG titers at day 14 (Post 1) and 28 (Post 2) and (B) functional antibody activity (Post 2 samples) against serotype 19F via OPA assay.

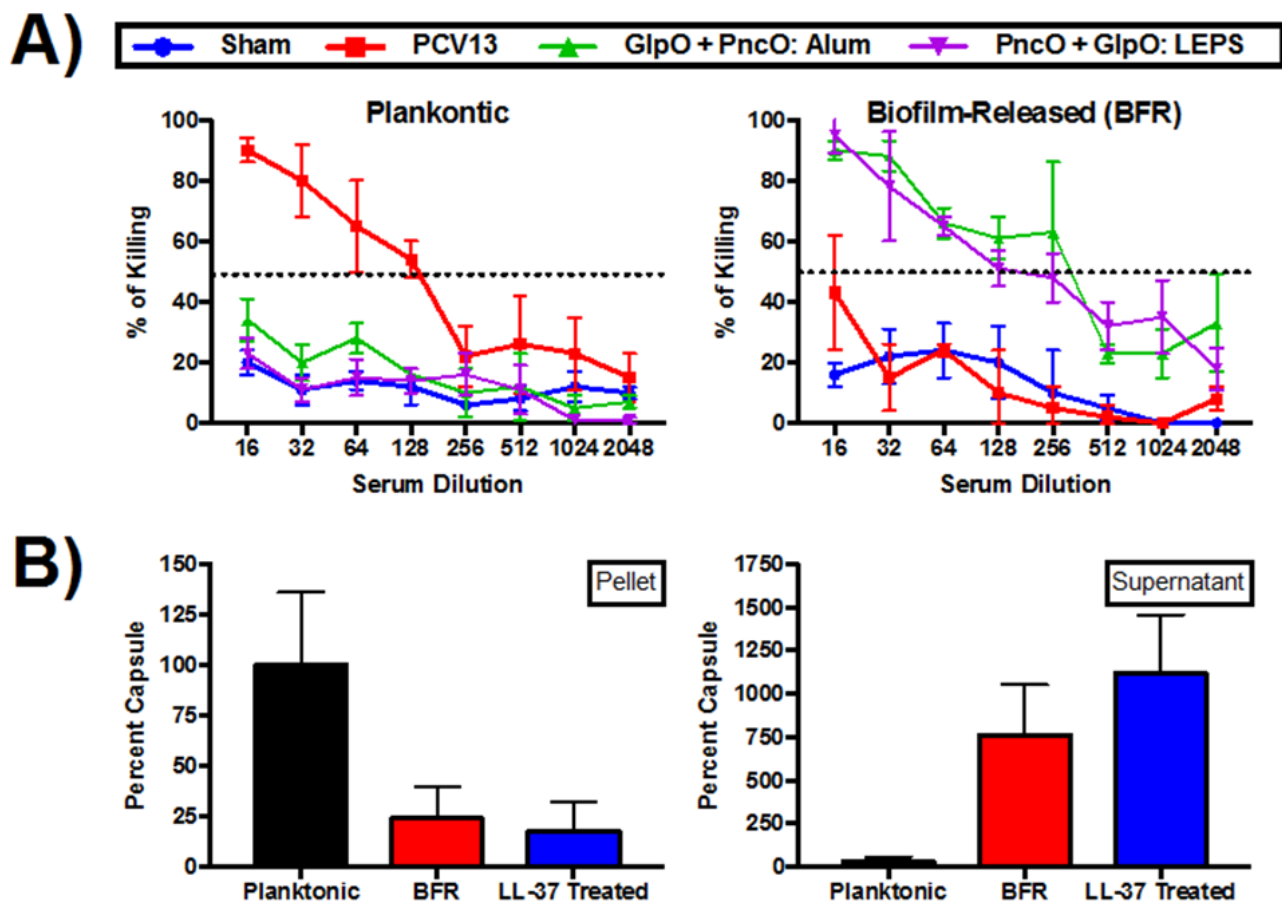

**fig. S6. OPA assay for GIpO and PncO directed against specific *S. pneumoniae* cell types.** (A) OPA for planktonic (left) and biofilm-released (BFR) serotype 19F bacteria mediated by serum from mice immunized with Prevnar 13 (PCV13), GIpO + PncO with Alum adjuvant, and GIpO + PncO with empty LEPS. (B) Capsular polysaccharide (CPS) content in the pellet (left) and supernatant (right) for planktonic bacteria, BFR bacteria, and planktonic bacteria treated with LL-37 to remove CPS; “Percent Capsule” values are relative to the planktonic samples in each sub-figure.

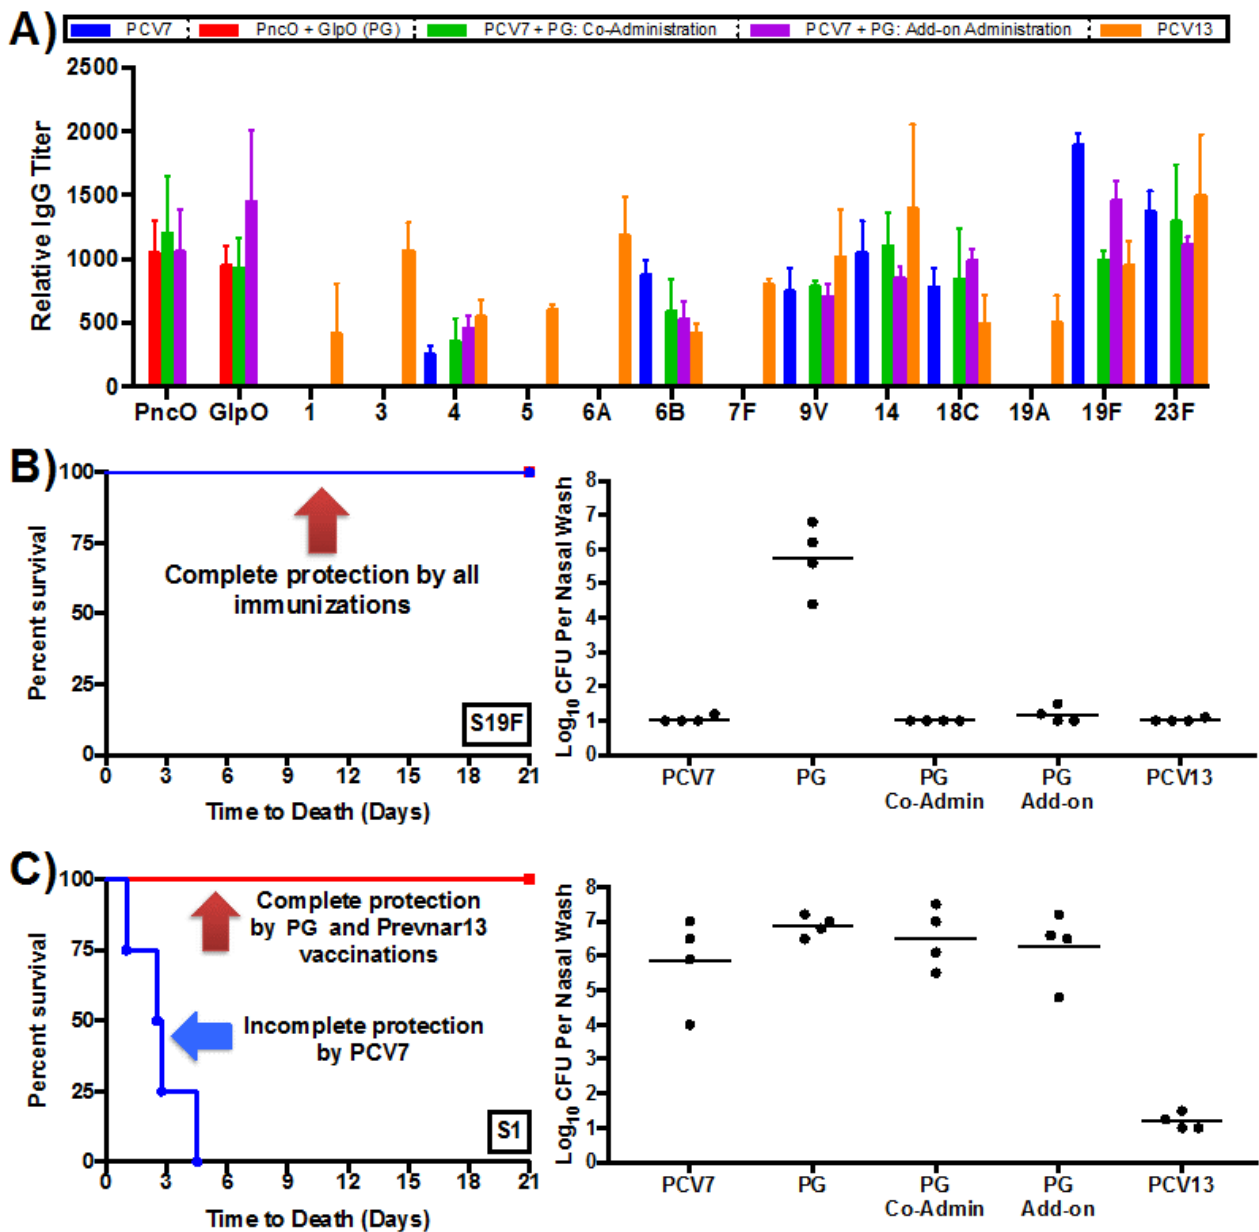

**fig. S7. Evaluation of immunogenicity of GIpO and PncO administered either jointly (coadministration) or as a booster (add-on) with Pnevna 7. (A)** IgG titers against PncO, GIpO, and specific serotypes resulting from color-coded vaccination samples. **(B)** Mouse protection (left; sepsis challenge model) and bacterial burden (right; measured 5 days post-colonization) upon GIpO and PncO (PG) administration either jointly or as a booster with Pnevna 7. Mice were challenged with serotype 19F (covered by Pnevna 7 and Pnevna 13 [PCV13]) or 1 (not covered by Pnevna 7 but covered by Pnevna 13).



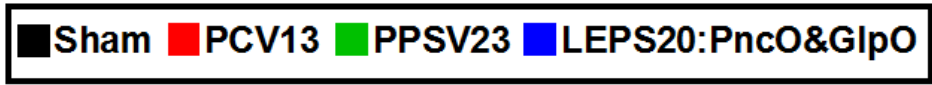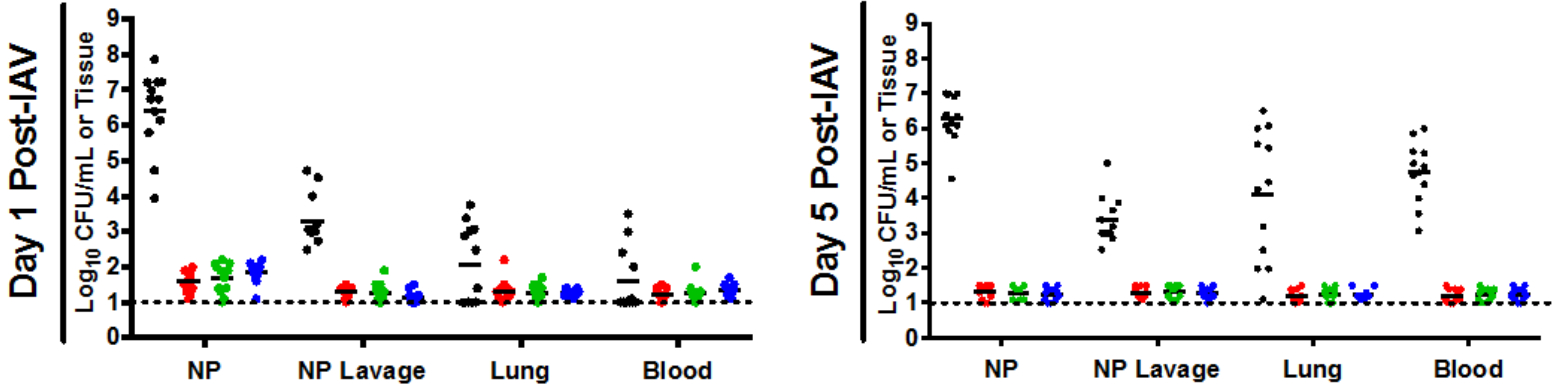

**fig. S8. Additional assessment of LEPS20/PncO and GlpO when using a murine IAV-induced pneumonia model with serotype 19F.** Bacterial counts from the nasopharynx surface (NP), nasopharynx wash (lavage), lungs, and blood 1 and 5 days post-IAV administration. Prevnar 13 (PCV13); Pneumovax 23 (PPSV23).

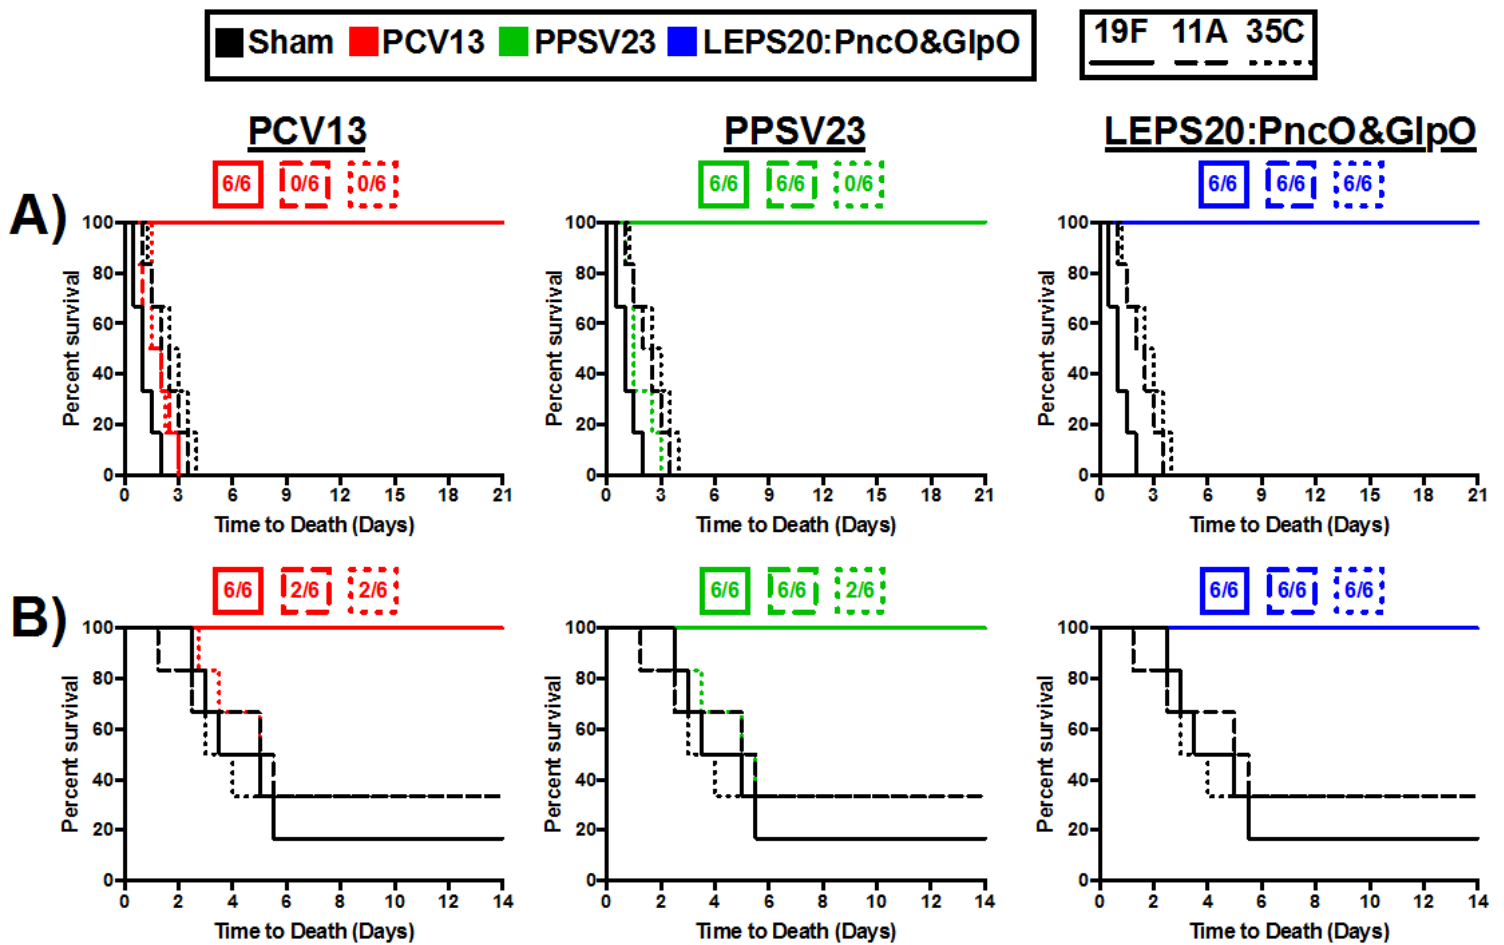

**fig. S9. Additional murine disease model assessment of LEPS20/PncO and GIpO.** Mouse challenge-protection data comparison between Prevnar 13 (PCV13), Pneumovax 23 (PPSV23), and the complete LEPS system using (A) sepsis and (B) pneumonia disease models. Survival (animal numbers boxed) is indicated across vaccination options when challenged with the indicated serotypes, which are partly covered by Prevnar 13 (19F) and Pneumovax (19F and 11A) and fully covered by LEPS20:PncO&GIpO.

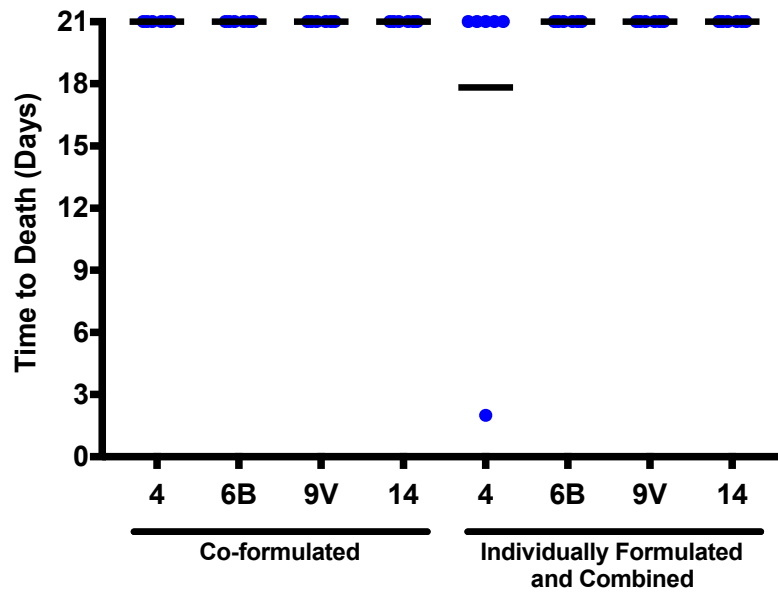

**fig. S10. Alternative LEPS formulation procedures and comparison in murine challenge protection assays.** Polysaccharides from *S. pneumoniae* serotypes 4, 6B, 9V, and 14 were either mixed and co-formulated during liposomal preparation or individually formulated within liposomal particles that were then combined prior to mouse vaccination. A sepsis disease model was then used to challenge the mice subjects with the individual serotypes (x-axis).

**table S1. OPA comparison between Prevnar 13, Pneumovax 23, and a LEPS formulation containing 20 polysaccharides (that is, 20 valent).** Values represent serum dilution at which 50% of cellular killing occurred in the OPA assay. Dashed lines indicate nonvaccine serotypes; higher OPA readings are attributed to a stronger antibody response (i.e., higher titers) for the particular polysaccharide.

| Serotype / Vaccine | PCV13 | PPSV23 | LEPS (20V) |
|--------------------|-------|--------|------------|
| 1                  | 129   | 88     | 40         |
| 2                  | ---   | 77     | 85         |
| 3                  | 98    | 23     | 101        |
| 4                  | 34    | 45     | 136        |
| 5                  | 47    | 67     | 38         |
| 6A                 | 55    | ---    | 169        |
| 6B                 | 39    | 26     | 151        |
| 7F                 | 240   | 29     | 151        |
| 8                  | ---   | 65     | 98         |
| 9N                 | ---   | 52     | 15         |
| 9V                 | 176   | 114    | 117        |
| 10A                | ---   | 128    | ---        |
| 11A                | ---   | 94     | ---        |
| 12F                | ---   | 34     | 128        |
| 14                 | 88    | 36     | 44         |
| 15B                | ---   | 143    | ---        |
| 17F                | ---   | 112    | 101        |
| 18C                | 222   | 46     | 156        |
| 19A                | 120   | 147    | 154        |
| 19F                | 144   | 49     | 243        |
| 20                 | ---   | 37     | 75         |
| 22F                | ---   | 77     | 149        |
| 23F                | 331   | 13     | 69         |
| 33F                | ---   | 16     | ---        |

**table S2. OPA comparison between Prevnar 13, Pneumovax 23, and the PncO + GlpO protein antigens (administered with alum adjuvant).** Values represent serum dilution at which 50% of cellular killing occurred in the OPA assay. Dashed lines indicate non-vaccine serotypes; higher OPA readings are attributed to a stronger antibody response (i.e., higher titers) for that particular polysaccharide. Serotype-specific *S. pneumoniae* strains utilized in the OPA assay include cellular phenotypes associated with initial colonization (planktonic) and disease (i.e., biofilm-released [BFR]).

| Serotype | PCV13      |     | PPSV23     |     | PncO + GlpO: Alum |     |
|----------|------------|-----|------------|-----|-------------------|-----|
|          | Planktonic | BFR | Planktonic | BFR | Planktonic        | BFR |
| 1        | 129        | --- | 88         | --- | ---               | 15  |
| 2        | ---        | --- | 77         | --- | ---               | 122 |
| 3        | 98         | --- | 23         | --- | ---               | 160 |
| 4        | 34         | --- | 45         | --- | ---               | 450 |
| 5        | 47         | --- | 67         | --- | ---               | 339 |
| 6A       | 55         | --- | ---        | --- | ---               | 87  |
| 6B       | 39         | --- | 26         | --- | ---               | 18  |
| 6C       | ---        | --- | ---        | --- | ---               | 276 |
| 6D       | ---        | --- | ---        | --- | ---               | 370 |
| 7A       | ---        | --- | ---        | --- | ---               | 169 |
| 7B       | ---        | --- | ---        | --- | ---               | 99  |
| 7C       | ---        | --- | ---        | --- | ---               | 145 |
| 7F       | 240        | --- | 29         | --- | ---               | 45  |
| 8        | ---        | --- | 65         | --- | ---               | 61  |
| 9A       | ---        | --- | ---        | --- | ---               | 96  |
| 9N       | ---        | --- | 52         | --- | ---               | 348 |
| 9V       | 176        | --- | 114        | --- | ---               | 382 |
| 10A      | ---        | --- | 128        | --- | ---               | 51  |
| 10F      | ---        | --- | ---        | --- | ---               | 26  |
| 11A      | ---        | --- | 94         | --- | ---               | 63  |
| 11B      | ---        | --- | ---        | --- | ---               | 61  |
| 11C      | ---        | --- | ---        | --- | ---               | 85  |
| 12A      | ---        | --- | ---        | --- | ---               | 94  |
| 12B      | ---        | --- | ---        | --- | ---               | 288 |
| 12F      | ---        | --- | 34         | --- | ---               | 366 |
| 13       | ---        | --- | ---        | --- | ---               | 103 |
| 14       | 88         | --- | 36         | --- | ---               | 221 |
| 15A      | ---        | --- | ---        | --- | ---               | 51  |
| 15B      | ---        | --- | 143        | --- | ---               | 368 |
| 15C      | ---        | --- | ---        | --- | ---               | 253 |
| 15F      | ---        | --- | ---        | --- | ---               | 166 |
| 16A      | ---        | --- | ---        | --- | ---               | 184 |
| 16F      | ---        | --- | ---        | --- | ---               | 202 |
| 17A      | ---        | --- | ---        | --- | ---               | 248 |
| 17F      | ---        | --- | 112        | --- | ---               | 196 |
| 18A      | ---        | --- | ---        | --- | ---               | 139 |

| Serotype | PCV13      |     | PPSV23     |     | PncO + GlpO: Alum |     |
|----------|------------|-----|------------|-----|-------------------|-----|
|          | Planktonic | BFR | Planktonic | BFR | Planktonic        | BFR |
| 18B      | ---        | --- | ---        | --- | ---               | 275 |
| 18C      | 222        | --- | 46         | --- | ---               | 339 |
| 18F      | ---        | --- | ---        | --- | ---               | 190 |
| 19A      | 120        | --- | 147        | --- | ---               | 62  |
| 19C      | ---        | --- | ---        | --- | ---               | 183 |
| 19F      | 144        | --- | 49         | --- | ---               | 339 |
| 20       | ---        | --- | 37         | --- | ---               | 214 |
| 21       | ---        | --- | ---        | --- | ---               | 266 |
| 22A      | ---        | --- | ---        | --- | ---               | 325 |
| 22F      | ---        | --- | 77         | --- | ---               | 366 |
| 23A      | ---        | --- | ---        | --- | ---               | 77  |
| 23B      | ---        | --- | ---        | --- | ---               | 353 |
| 23F      | 331        | --- | 13         | --- | ---               | 273 |
| 24A      | ---        | --- | ---        | --- | ---               | 24  |
| 24B      | ---        | --- | ---        | --- | ---               | 281 |
| 24F      | ---        | --- | ---        | --- | ---               | 75  |
| 25F      | ---        | --- | ---        | --- | ---               | 236 |
| 27       | ---        | --- | ---        | --- | ---               | 110 |
| 28A      | ---        | --- | ---        | --- | ---               | 235 |
| 28F      | ---        | --- | ---        | --- | ---               | 351 |
| 29       | ---        | --- | ---        | --- | ---               | 80  |
| 30       | ---        | --- | ---        | --- | ---               | 292 |
| 31       | ---        | --- | ---        | --- | ---               | 186 |
| 33A      | ---        | --- | ---        | --- | ---               | 352 |
| 33F      | ---        | --- | 16         | --- | ---               | 186 |
| 34       | ---        | --- | ---        | --- | ---               | 352 |
| 35A      | ---        | --- | ---        | --- | ---               | 97  |
| 35B      | ---        | --- | ---        | --- | ---               | 52  |
| 35C      | ---        | --- | ---        | --- | ---               | 186 |
| 35F      | ---        | --- | ---        | --- | ---               | 31  |
| 37       | ---        | --- | ---        | --- | ---               | 177 |
| 38       | ---        | --- | ---        | --- | ---               | 81  |
| 39       | ---        | --- | ---        | --- | ---               | 186 |
| 41A      | ---        | --- | ---        | --- | ---               | 352 |
| 42F      | ---        | --- | ---        | --- | ---               | 186 |

**table S3. GlpO and PncO summary.**

| Gene | Size (aa) | Function                                          |
|------|-----------|---------------------------------------------------|
| GlpO | 609       | $\alpha$ -glycerophosphate oxidase                |
| PncO | 230       | Bacteriocin ABC transporter transmembrane protein |
